# Supplementary material
Source: PubMed Central journal article supplement (PMC3095581)
Supplement: NIHMS284444-supplement-1_si_001.pdf [file NIHMS284444-supplement-1_si_001.pdf]

# Site-Specific Hydration Dynamics in the Nonpolar Core of a Molten Globule by Dynamic Nuclear Polarization of Water

Brandon D. Armstrong<sup>1,#</sup>, Jennifer Choi<sup>2,†,##</sup>, Carlos López<sup>3,†</sup>, Darryl A. Wesener<sup>2,###</sup>, Wayne Hubbell<sup>3</sup>, Silvia Cavagnero<sup>2,\*</sup>, Songi Han<sup>4,\*</sup>

<sup>1</sup>Department of Physics, University of California-Santa Barbara, Santa Barbara, CA. 93106-9530

<sup>2</sup>Department of Chemistry, University of Wisconsin-Madison, Madison, WI. 53706

<sup>3</sup>Department of Chemistry and Biochemistry and the Jules Stein Eye Institute, University of California-Los Angeles, CA. 90095-7008

<sup>4</sup>Department of Chemistry and Biochemistry and Materials Research Laboratory, University of California-Santa Barbara, 93106-9510

<sup>#</sup>Present address: Department of Physics, Harvard University, 17 Oxford St., Cambridge, MA. 02138

<sup>##</sup>Present address: College of Pharmacy, University of Michigan, Ann Arbor, MI. 48109-1065

<sup>###</sup>Present address: Department of Biochemistry, University of Wisconsin-Madison, Madison, WI. 53706

<sup>†</sup> These authors contributed equally to the work

<sup>\*</sup> Co-corresponding authors

CORRESPONDING AUTHORS EMAIL: Songi Han, [songi@chem.ucsb.edu](mailto:songi@chem.ucsb.edu) and Silvia Cavagnero, [cavagnero@chem.wisc.edu](mailto:cavagnero@chem.wisc.edu)

## Supplementary Materials and Methods

*EPR simulations.* Single- and multiple- component EPR spectra were simulated with the NLSL program assuming a two-component MOMD (microscopic order, macroscopic disorder) model that described the anisotropic motion of the nitroxide (1); the software is available at <ftp://ftp.ccmr.cornell.edu/pub/freed>. For all simulations, the starting values of the **A** and **g** magnetic tensors were taken as  $g_{xx} = 2.0078$ ,  $g_{yy} = 2.0058$ ,  $g_{zz} = 2.0022$ , and  $A_x = 6.2$ ,  $A_y = 5.9$ . The  $A_z$  values ( $A_z$  in the NLSL software is the same parameter as  $A_{zz}'$  in the text) were obtained from spectra recorded in the absence of motion in frozen solutions at  $-50$  °C.  $A_z$  was kept constant during the fitting procedure. The  $\log_{10}$  of the three components of the rotational diffusion tensor are given in a modified spherical form as  $\langle R \rangle = \frac{1}{3}(R_x + R_y + R_z)$ ,  $N = R_z - \frac{1}{2}(R_x + R_y)$ , and  $N_{xy} = (R_x - R_y)$ , where  $R_x$ ,  $R_y$ , and  $R_z$  are the principal components in Cartesian coordinates. The immobile states of E41R1, V66R1 (MG-state), and I142R1 were taken to have isotropic motion with  $N = N_{xy} = 0$ , while the other states have axially symmetric (around the z-axis) anisotropic motion with tilt angles of the diffusion tensor  $\alpha_D = 0^\circ$ ,  $\beta_D = 36^\circ$ ,  $\gamma_D = 0^\circ$ , and subject to an ordering potential described by the coefficient  $C_{20}$  from which the order parameter is computed. Least-square fits were obtained with  $\langle R \rangle$ ,  $N$  and  $C_{20}$  as adjustable parameters. After these parameters were optimized, the principal values of the **A** and **g** magnetic tensor (except  $A_z$ ) were allowed to vary slightly to obtain the final best fit. The effective rotational correlation time for the immobile ( $\tau_i$ ) and mobile ( $\tau_m$ ) components was calculated as  $\tau = 1/6\langle R \rangle$ , and the order parameter  $S$  was computed directly from  $C_{20}$  as described (1). A summary of all the above parameters from EPR data fitting is provided in Table S1.

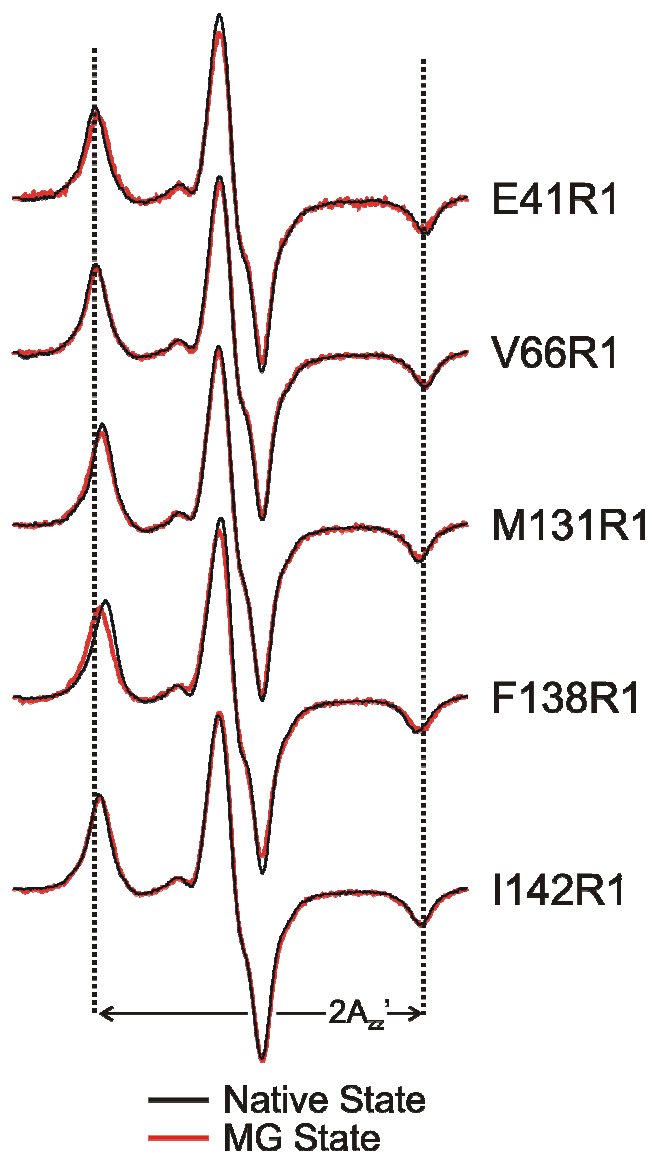

**Figure S1.** EPR spectra of spin-labeled apoMb variants recorded in the absence of global motions at  $-50^{\circ}\text{C}$ . For each mutant, the spectra of the native and molten globule states are superimposed. The splitting of the resolved hyperfine extrema ( $2A_{zz}'$ ) is labeled in the figure.

## Native State

## Molten Globule State

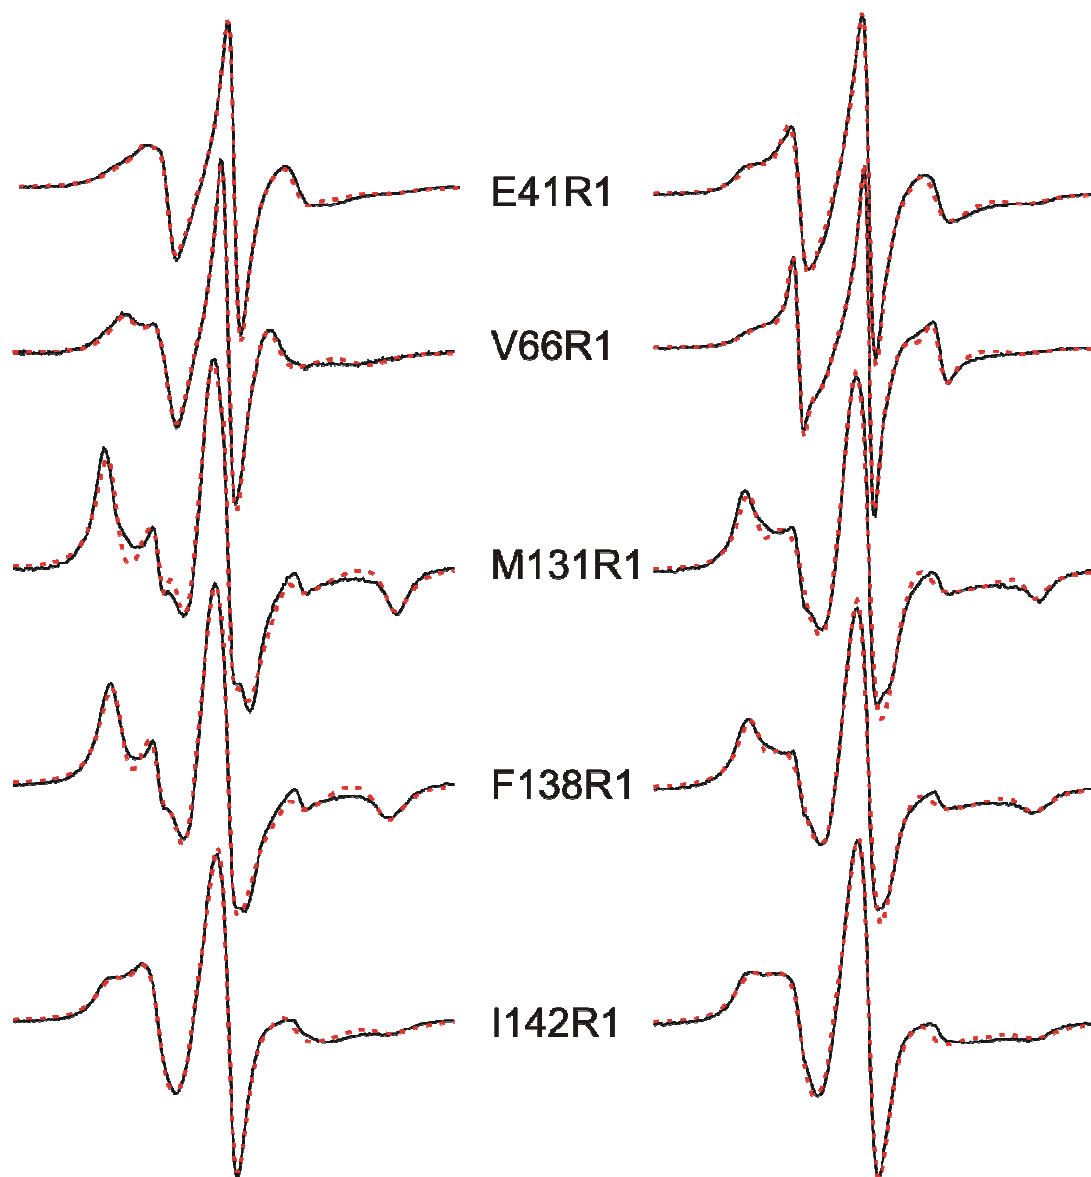

**Figure S2.** Experimental EPR spectra (solid black lines) and matching curve fits (red dashed lines). All spectra were fit to a two-component model except for V66R1 in the native state, which was fit to a single component.

| Sample    | $A_{zz}'$ (Gauss) | % <i>i</i> | $\tau_i$ (ns) | % <i>m</i> | $\tau_m$ (ns) | $S_i$ | $S_m$ |
|-----------|-------------------|------------|---------------|------------|---------------|-------|-------|
| M131R1-N  | 34.90             | 95         | 18.7          | 5          | 1.0           | 0.88  | 0.25  |
| F138R1-N  | 34.38             | 95         | 14.0          | 5          | 1.0           | 0.85  | 0.22  |
| I142R1-N  | 35.40             | 61         | 10.0          | 39         | 1.5           | ---   | 0.31  |
| E41R1-N   | 36.40             | 58         | 5.9           | 42         | 1.6           | ---   | 0.35  |
| V66R1-N   | 36.22             | ---        | ---           | 100        | 3.1           | ---   | 0.45  |
| M131R1-MG | 35.10             | 60         | 18.7          | 40         | 2.0           | 0.88  | 0.40  |
| F138R1-MG | 35.38             | 59         | 14.0          | 41         | 2.1           | 0.85  | 0.41  |
| I142R1-MG | 35.40             | 60         | 12.7          | 40         | 1.8           | ---   | 0.43  |
| E41R1-MG  | 35.74             | 57         | 8.5           | 43         | 2.1           | ---   | 0.14  |
| V66R1-MG  | 36.13             | 72         | 5.2           | 28         | 1.1           | ---   | 0.07  |

**Table S1.** Expanded summary EPR data and fit parameters.  $A_{zz}'$  is the effective hyperfine splitting obtained from the EPR spectra at  $-50^\circ\text{C}$  (shown in Fig. S1). %*i* and %*m* are the relative percentages of immobile and mobile components, respectively, of the EPR spectra obtained from the fits.  $\tau_i$  and  $\tau_m$  are the effective rotational correlation times of the spin label immobile and mobile components.  $S_i$  and  $S_m$  are the order parameters of the immobile and mobile component, and are calculated from EPR data fitting as described above.

## **References**

1. Budil DE, Lee S, Saxena S, & Freed JH (1996) Nonlinear-Least-Squares Analysis of Slow-Motion EPR Spectra in One and Two Dimensions Using a Modified Levenberg-Marquardt Algorithm. *J. Magn. Reson. A* 120(2):155-189.
